# MIND TO MIND

*Creative writing that explores the abstract side  
of our profession and our lives*

*Stephen T. Harvey, M.D., Editor*

## On Scene

James M. Berry, M.D.

L  
Late home alone, in hopes of rest  
But daughter phones in great distress;  
Had desperate call from high-school friend  
Arrived at house, forced her way in,

Saw bottle empty, bathroom scrubbed  
Friend very still, face-down in tub;  
“Call 9-1-1, stay on the line,”  
I drive like mad, thoughts slowing time;

Strobes flash red through viscous night,  
Medics on scene, chaos and light  
Daughter pale, faint cry from rear  
As wounded soul spills pain and fear;

Gurney bumps down long back stair;  
Now it's quiet, drink fresh air—  
I'm like a felon, freed from jail  
Her endless hug, and long exhale...

---

Carol Wiley Cassella, M.D., served as Handling Editor for this submission.

From the Vanderbilt University School of Medicine, Nashville, Tennessee. james.berry@vanderbilt.edu

Accepted for publication August 23, 2016.

*Permission to reprint granted to the American Society of Anesthesiologists, Inc., and Wolters Kluwer Health, Inc., by copyright author/owner.*  
Anesthesiology 2017; 126:345
